# Supplementary material for: Analysis of the mental сondition of Ukrainians and ways to optimize it during the Ukrainian-Russian war
Source: Research Square preprint supplement (doi:10.21203/rs.3.rs-4637130/v1), 2024-07-22
Supplement: Supplementary file 1 [file c93f6b01b19764f0ae9f8485.docx]

**Таble 1** The structure of depressive disorders among Ukrainians during 2021-2023

| **Types of depressive disorders** | **Patients with a clinical diagnosis of depression**  **n=171** | | | | | |
| --- | --- | --- | --- | --- | --- | --- |
| **2021** | | **2022** | | **2023** | |
| **men,**  **n=85** | **women,**  **n=86** | **men,**  **n=85** | **women,**  **n=86** | **men,**  **n=85** | **women,**  **n=86** |
| **n(%)** | **n(%)** | **n(%)** | **n(%)** | **n(%)** | **n(%)** |
| A mild depressive episode | 41(48,6%) | 48(55,6%) | 28(33,5%) | 24(28.2%) | 22(26,2%) | 17(19.5%) |
| Moderate depressive episode | 19(22,4%) | 18(20,4%) | 14(16,5%) | 26(29.8%) | 15(17,8%) | 18(21.5%) |
| Major depressive episode without psychotic symptoms | 8(9,8%) | 4(4,6%) | 12(14.6%) | 6(7.1%) | 13(15,7%) | 14(16.0%) |
| Major depressive episode with psychotic symptoms | 7(8,2%) | 5(6,4%) | 13(16.4%) | 10(11.9%) | 15(17,3%) | 12(14.0%) |
| Recurrent depressive disorder | 6(6,9%) | 7(7,9%) | 10(11,1%) | 9(10.5%) | 12(14,5%) | 11(12.5%) |
| Persistent [affective] mood disorders/  dysthymia | 4(4,1%) | 4(5,1%) | 8(7,9%) | 11(12.5%) | 8(8,2%) | 14(16.5%) |

**Table 2** Gender-age characteristics of the course of anxiety disorders during 2021-2023

| **Types of anxiety disorders** | **Patients with an established clinical diagnosis , n=171** | | | | | |
| --- | --- | --- | --- | --- | --- | --- |
| **2021** | | **2022** | | **2023** | |
| **men**  **(n=85)** | **women,**  **n=86** | **men**  **n=85** | **women**  **n=86** | **men**  **n=85** | **women**  **n=86** |
| Episodic  Paroxysmal  anxiety | 43(51.3%) | 43(49.9%) | 23(27.0%) | 18(21.1%) | 12(13.7%) | 11(12.5%) |
| Phobic anxiety disorders | 9(10.7%) | 10(12.1%) | 13(15.0%) | 17(20.8%) | 16(18.3%) | 19(22.9%) |
| Panic disorder | 14(15.4%) | 19(21.7%) | 15(17.6%) | 25(28.2%) | 16(18.1%) | 26(30.1%) |
| Generalized anxiety disorder | 19(22.6%) | 14(16.3%) | 34(40.4%) | 26(29.9%) | 41(49.9%) | 30(34.5%) |

**Таble 3**  The structure of the post-traumatic stress disorder in Ukrainians during 2021-2023

| Types of Post Traumatic Stress Disorder (PTSD) | The total amount of patients with a clinically established diagnosis,  n=171 | | | | | |
| --- | --- | --- | --- | --- | --- | --- |
| 2021 | | 2022 | | 2023 | |
| men,  n=85 | women,  n=86 | men,  n=85 | women,  n=86 | men,  n=85 | women,  n=86 |
| PTSD with normal stress response | 31(36.4%) | 25(29.9%) | 30(35.9%) | 26(30.9%) | 21(25.7%) | 24(28.0%) |
| Acute Stress disorder | 16(19.9%) | 14(17.1%) | 16(19.0%) | 15(18.1%) | 13(15.3%) | 16(19.0%) |
| Complex PTSD | 6(8.1%) | 7(8.5%) | 11(11.8%) | 12(14.6%) | 15(16.6%) | 16(18.2%) |
| Comorbid PTSD | 6(7.2%) | 7(8.3%) | 13(15.1%) | 15(16.0%) | 15(17.0%) | 15(17.8%) |
| Uncomplicated PTSD | 24(28.4%) | 31(36.2%) | 15(18.2%) | 17(20.4%) | 21(25.4%) | 14(17.0%) |
